# Supplementary material
Source: PubMed Central journal article supplement (PMC5754144)
Supplement: ptc.2015-76EP_supplement1.pdf [file ptc.2015-76EP_supplement1.pdf]

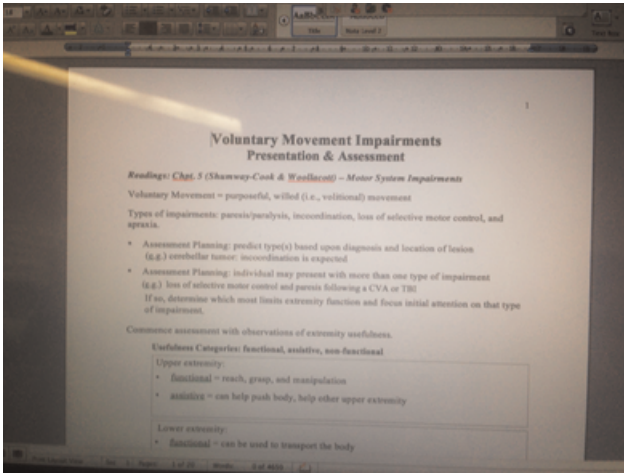

Figure S1 Putting school first.

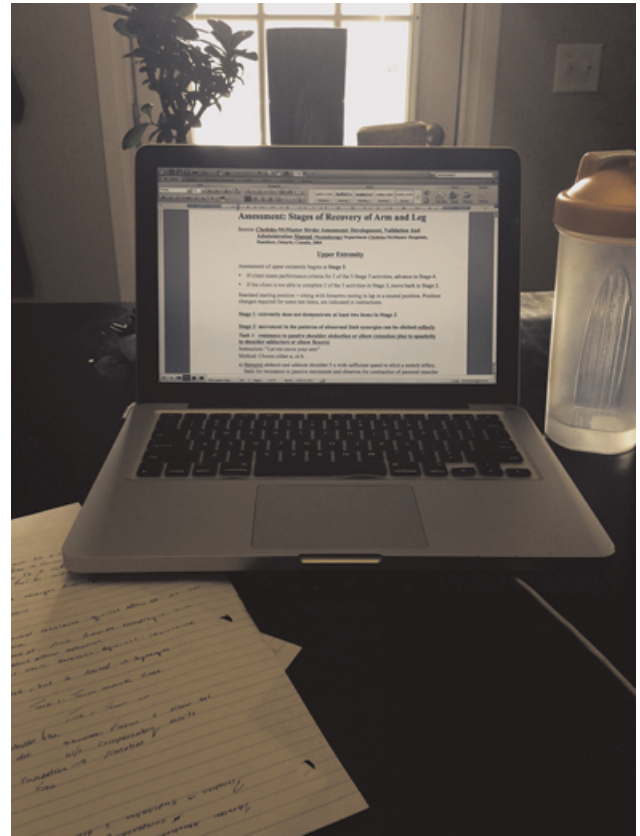

Figure S3 Prioritizing school over other activities.

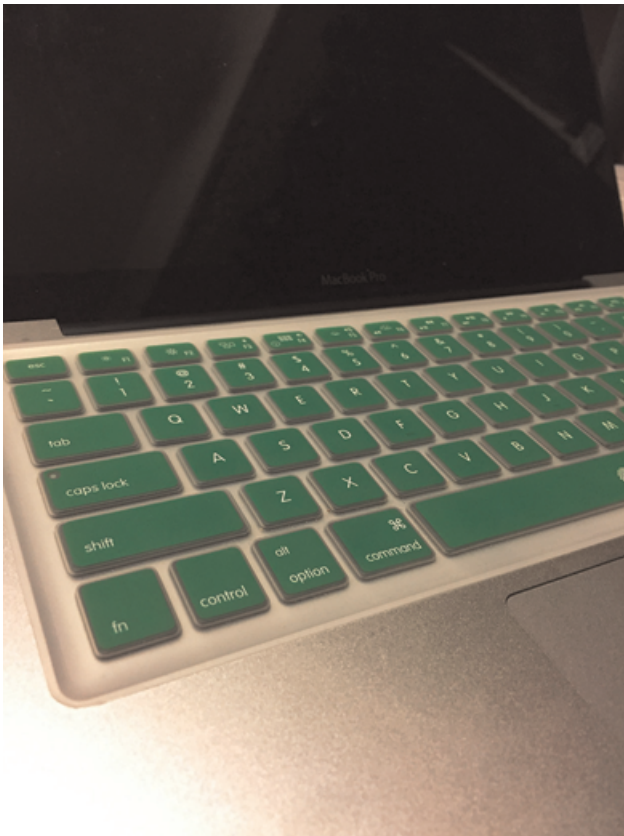

Figure S2 Lifestyle choices based around studying.

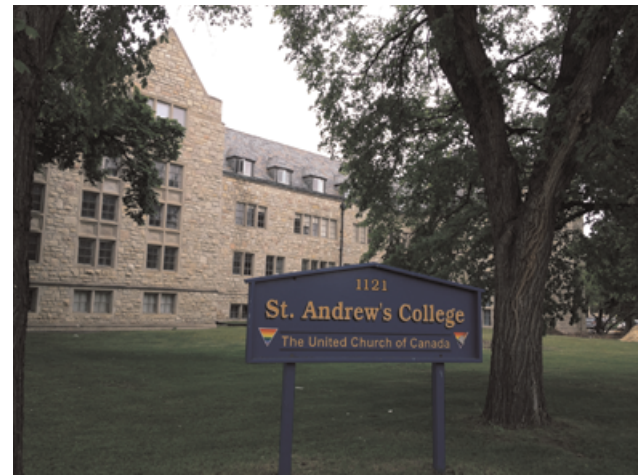

Figure S4 Sacrificing to prioritize school work.



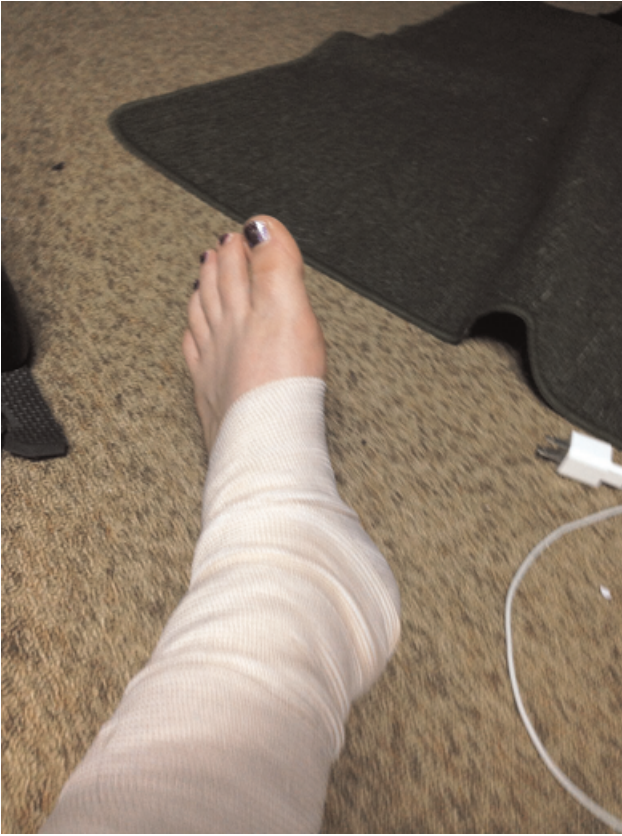

**Figure S5** Injuries as a barrier to maintaining physical activity.

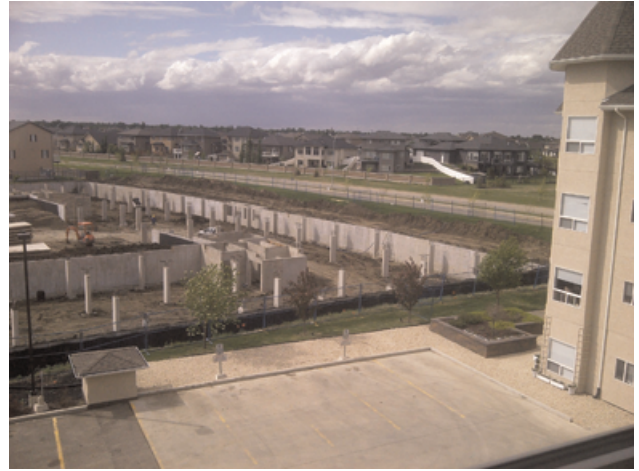

**Figure S7** Built environment has an impact on physical activity.

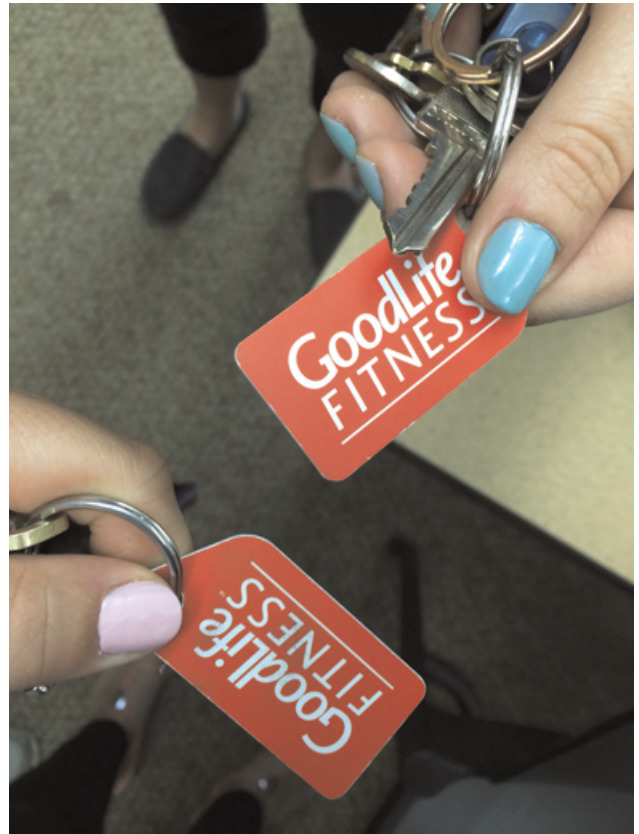

**Figure S8** Proximity to exercise facilities supports physical activity. Logo use courtesy of GoodLife Fitness.

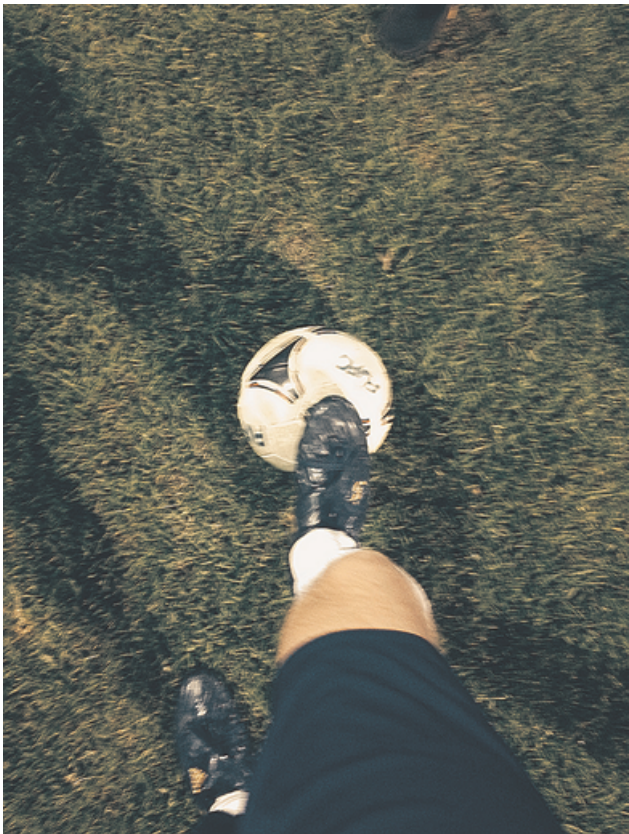

**Figure S6** Scheduling exercise as a reward for studying.
